# Spectroscopic identifications of SWIRE sources in ELAIS-N1

M. Trichas,<sup>1\*</sup> M. Rowan-Robinson,<sup>1</sup> A. Georgakakis,<sup>2</sup> I. Valtchanov,<sup>3</sup> K. Nandra,<sup>1</sup>  
D. Farrah,<sup>4</sup> G. Morrison,<sup>5,6</sup> D. Clements<sup>1</sup> and I. Waddington<sup>4</sup>

<sup>1</sup>*Astrophysics Group, Blackett Laboratory, Imperial College London, Prince Consort Road, London SW7 2BW*

<sup>2</sup>*National Observatory of Athens, I. Metaxa & V. Pavlou, Athens 15236, Greece*

<sup>3</sup>*Herschel Science Centre, ESAC, ESA, Spain*

<sup>4</sup>*Astronomy Centre, Department of Physics & Astronomy, University of Sussex, Brighton BN1 9QH*

<sup>5</sup>*Institute for Astronomy, University of Hawaii, Honolulu, HI 96822, USA*

<sup>6</sup>*Canada–France–Hawaii Telescope, Kamuela, HI 96743, USA*

Accepted 2010 March 5. Received 2010 March 5; in original form 2009 June 29

## ABSTRACT

We present the largest spectroscopic follow-up performed in SWIRE ELAIS-N1. We were able to determine redshifts for 289 extragalactic sources. The values of spectroscopic redshifts of the latter have been compared with the estimated values from our photometric redshift code with very good agreement between the two for both galaxies and quasars. Six of the quasars are hyperluminous infrared (IR) galaxies all of which are broad-line active galactic nuclei. We have performed emission-line diagnostics for 30 sources using the [O III]/H $\beta$ , [N II]/H $\alpha$  and [S II]/H $\alpha$  line ratios in order to classify these 30 sources into star forming, Seyferts, composite and LINER and compare the results to the predictions from our spectral energy distribution template fitting methods and mid-IR selection methods.

**Key words:** galaxies: evolution – galaxies: photometry – quasars: general – cosmology: observations.

## 1 INTRODUCTION

A major challenge in the quest to constrain the accretion history of the Universe is to compile unbiased samples of active galactic nuclei (AGNs). Obscuration of the AGN emission introduces severe selection effects against certain types of AGNs. Although X-ray observations, and especially hard X-rays (2–10 keV), have been shown to be very efficient in minimizing these biases, in the presence of large obscuring gas column densities ( $>10^{24}$  cm $^{-2}$ ) hard X-ray surveys are not able to fully sample the entire population of obscured AGNs (Georgantopoulos, Georgakakis & Akylas 2007).

The bias of hard X-ray imaging surveys against heavily obscured AGNs has motivated alternative methods for finding such systems, especially at mid-infrared (mid-IR) wavelengths. The disadvantage of mid-IR surveys is that the AGNs are outnumbered by star-forming galaxies and some selection method is necessary to separate the two populations. It has been suggested that mid-IR colour–colour plots can be used to effectively isolate obscured AGNs. The principle behind this approach is that luminous AGNs are characterized by red and almost featureless spectra in mid-IR. These properties make their IRAC/MIPS colours unique among other IR sources, such as galaxies and stars, providing a potentially powerful tool to identify

them. Different combinations of mid-IR colours have been proposed to select AGNs. Lacy et al. (2004) and Hatziminaoglou et al. (2005) define their selection criteria based on the mid-IR colours of luminous high- $z$  quasi-stellar objects (QSOs) identified in the Sloan Digital Sky Survey (SDSS). A large fraction of the sources defined as AGNs in this way have no X-ray counterparts, tentatively suggesting obscuration of the central engine. Although, these selection methods have been successful in selecting obscured AGNs, the number found does not match the predictions of some models for the X-ray background (Georgantopoulos et al. 2008). On the other hand, good-quality optical spectroscopic data are a powerful tool for finding AGNs even if they are heavily obscured and low luminosity (Kauffmann et al. 2004).

The motivation behind this paper is to test the AGN selection methods in IR by combining IR data with optical spectroscopic data. In this paper we present results of the largest spectroscopic survey in the ELAIS-N1 region of the *Spitzer*-SWIRE survey (Lonsdale et al. 2003, 2004). Section 2 describes the observations, Section 3 analyses the results, discussing hyperluminous IR galaxies (HLIRGs) in the sample and the comparison of photometric and spectroscopic redshifts. Section 4 discusses emission-line diagnostics and Section 5 discusses IR colour–colour diagrams and spectral energy distributions (SEDs). Section 6 gives a summary of our results. A cosmological model with  $\Omega_0 = 0.3$ ,  $\lambda_0 = 0.7$  and a Hubble constant of 72 km s $^{-1}$  Mpc $^{-1}$  is used throughout.

\*E-mail: m.trichas@imperial.ac.uk

**Table 1.** Number of sources observed per priority group. Details of each priority group are given in Section 2.1.

| Priorities | GMOS | WIYN |
|------------|------|------|
| i          | 45   | 23   |
| ii         | 101  | 34   |
| iii        | 63   | 48   |
| iv         | –    | 12   |
| v          | –    | 50   |
| Total      | 209  | 167  |

## 2 OBSERVATIONS

### 2.1 Sample selection

The spectroscopic targets for the Gemini-North and WIYN runs were selected from the available multiwavelength data in SWIRE-EN1 field.

Target lists were prepared from the then latest version of the SWIRE Photometric Redshift Catalogue (Rowan-Robinson et al. 2005), selecting sources with  $21.5 < r < 23.5$  mag for Gemini and  $r < 21$  for WIYN. For Gemini, the candidate sources were distributed between three prioritized groups, with top priority given to X-ray sources in the *Chandra* fields. Next priority were sources with either (i) optical or IR SEDs identified as AGNs in the catalogue or (ii) photometric redshifts  $z > 1$ . All other SWIRE sources with  $21.5 < r < 23.5$  were assigned to the lowest priority group (iii). For WIYN, the following priority was used: (i) brightest cluster galaxies (see below), (ii) X-ray-detected sources (from both *Chandra* and *XMM-Newton*), (iii) AGN-selected IR sources, (iv) galaxies from the region between the two clusters and (v) 24- $\mu$ m sources. Table 1 gives the number of the sources observed per priority list.

### 2.2 Multiwavelength data

*Optical/Hubble Space Telescope (HST)*: there is a single deep *HST* observation within the SWIRE-EN1 field (Benitez et al. 2004), taken as part of the early release observations of the Advanced Camera for Surveys (ACS). The ACS field is centred on the Tadpole galaxy (also known as UGC 10214, VV 29 and Arp 188), a bright spiral at  $z = 0.032$  with an extended tidal tail (Jarrett et al. 2006). This 14-arcmin<sup>2</sup> image includes 156 galaxies detected by both ACS and SWIRE (Hatziminaoglou et al. 2005).

*Optical/IR*: The optical and IR observations are part of the *Spitzer*-SWIRE survey (Lonsdale et al. 2003, 2004).

*X-ray*: Within the SWIRE-EN1 field, we have X-ray observations taken as part of the ELAIS Deep X-ray Survey (Manners et al. 2003). These consist of a single 71.5-ks pointing with the *Chandra* X-ray observatory’s Advanced CCD Imaging Spectrometer, covering an area of  $17 \times 17$  arcmin<sup>2</sup>. There are 102 sources in common between *Chandra* and SWIRE, with X-ray fluxes brighter than  $2.3 \times 10^{-15}$  erg s<sup>-1</sup> cm<sup>-2</sup> in the 0.5–8 keV band (Franceschini et al. 2005). There are also a number of *XMM-Newton* observations (PI R. Mann) but unfortunately only three are good enough and not heavily affected by periods of high background. These three observations with the same centre cover a field of  $\sim 15$  arcmin radius, south of the region covered by *Chandra*. Two serendipitous galaxy clusters, separated by 13 arcmin, were found in the *XMM* field

(Valtchanov et al., in preparation) and the brightest cluster galaxies as well as some other putative cluster members were included in the target lists.

### 2.3 Gemini

We have observed the SWIRE ELAIS-N1 field with the Gemini Multi-Object Spectrograph (GMOS) on the 8.1-m Gemini-North telescope. The observations were carried out in queue-scheduled mode during 2005 April 3 to 2005 May 15. GMOS provides multislit optical spectroscopy over a 5.5-arcmin field of view. We used the 400-lines mm<sup>-1</sup> red grating (R400\_G5305) at a central wavelength of 7500 Å. Nod-and-shuffle mode was used, with a 3.0 arcsec nod along a 5-arcsec slit and a charge shuffle of 5.1 arcsec. A single integration consisted of 15 cycles, each cycle being a sequence of four nods in a BAAB configuration (where A and B represent the different nod positions), each of 30-s duration, giving an integration time of 1800 s. This was then repeated with the central wavelength offset by 50 Å, to give full wavelength coverage across the gaps between different CCDs. Thus each source was observed with a total integration time of 3600 s.

The mask preparation software used the target list priorities automatically assigning slits to objects in the target list and we were able to place 15–20 slits on each of the 13 masks (excluding acquisition/guide stars), giving 230 objects in total.

The *HST*/ASC field was covered with one GMOS pointing. The *Chandra* field was covered with six pointings of GMOS, each pointing having a field of view of  $5.5 \times 5.5$  arcmin<sup>2</sup>, observing a total of 14 X-ray AGNs from the ELAIS N1 Deep X-ray survey. In addition, we selected a further six GMOS pointings, one in the *XMM* field and the rest randomly scattered across the SWIRE field.

### 2.4 WIYN

A selected number of sources from an area of approximately 1 deg<sup>2</sup> was included for spectroscopic observations on the NOAO WIYN 3.5-m telescope using the HYDRA multi-object bench spectrograph. The observations were performed with the ‘red’ and ‘blue’ wing of the camera on two different runs: the ‘red’ run took place on 2005 April 12–14 and the ‘blue’ run on 2005 July 2–4.

An automated procedure allocated the fibres in the field. In a couple of cases an optimization by hand was possible. For the second run (using the blue wing of the spectrograph) the priority was given to those objects already observed with the red spectrograph and the new objects were concatenated at the end of the list.

### 2.5 Data reduction

Data reduction of GMOS masks was carried out with the v1.8 GMOS package within IRAF while WIYN observations were reduced following the standard procedure for HYDRA. Redshifts were determined by visual inspection of the one-dimensional spectra, through the identification of emission and absorption features. The presence of strong emission and absorption features such as C IV, [C III] $\lambda$ 1909, [Mg II], Ne v, [O II] $\lambda$ 3727, H $\beta$ , [O III] $\lambda$ 4959, [O III] $\lambda$ 5007, H $\alpha$  and [N II] $\lambda$ 6583 directly indicated the redshift, especially in the cases where at least three of these lines were present. We successfully derived 197 and 137 redshifts from our GMOS and WIYN runs, respectively. For most of the latter we had both blue and red parts, the blue covering the wavelength range 3500–6500 Å and the red one 5000–10 000 Å.

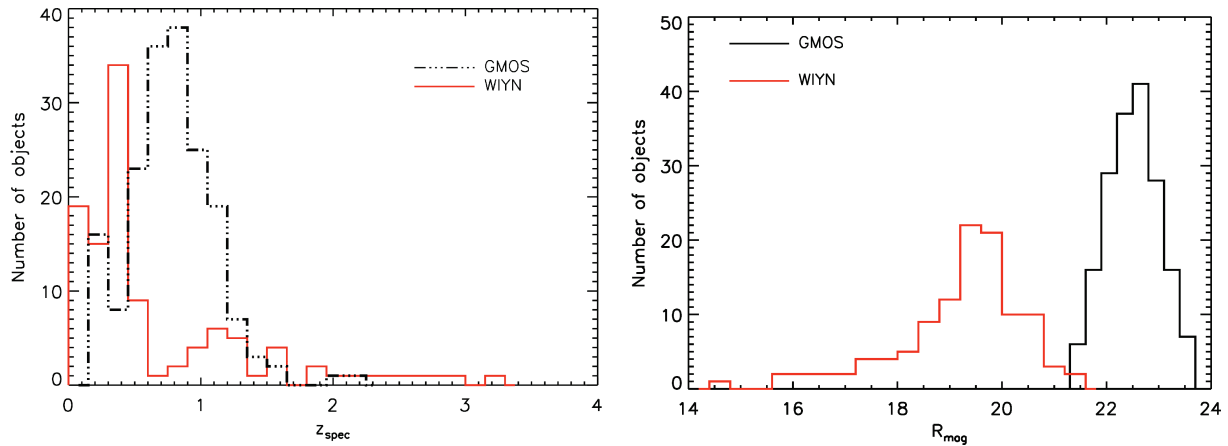

**Figure 1.** Left-hand panel: the overall redshift distribution of all extragalactic sources in the final spectroscopic catalogue, divided into objects with spectroscopy from Gemini GMOS (dashed black line) and from WIYN Hydra (solid red line). Right-hand panel:  $R$ -band distribution for the extragalactic sources. Lines and colours same as left-hand panel.

### 3 RESULTS

GMOS/WIYN spectroscopic follow-up represents the largest optical spectroscopic sample obtained in ELAIS-N1 to date, with a total of 376 objects observed. We were able to successfully determine redshifts for 334 sources, a success rate of 89 per cent. For the remaining 47 sources a redshift could not be determined due to the bad quality of the spectra or the lack of prominent spectral features in the wavelength range covered. Out of the 334 successfully identified objects, 40 (12 per cent) were found to have redshift 0 (stars) mostly from the 24- $\mu\text{m}$  selection. For the remainder of this work only the 294 objects identified as extragalactic sources are used. A table of our final spectroscopic redshift catalogue is provided in electronic form (see Supporting Information). A sample of the table with an explanation of the various properties provided is given in Table A1. We have used a classification system similar to that of Le Fevre et al. (1995) with  $z\text{flag} = 1$ : ambiguous solutions due to noisy spectra;  $z\text{flag} = 2$ : reliable spectroscopic redshifts with at least two lines;  $z\text{flag} = 3$ : highly reliable redshifts with three or more lines and  $z\text{flag} = 9$ : redshifts based on a single strong line.

The redshift distribution of the spectroscopic sample is shown in Fig. 1. The WIYN distribution has a peak at redshift of 0.3–0.4 because many of the sources targeted during this run were the clusters brightest galaxies and also putative cluster members between the two *XMM* clusters, the regular, north-eastern and the irregular, south-western cluster (Valchanov et al. in preparation). In addition most of the 24  $\mu\text{m}$  sources targeted were also at  $z < 0.5$ . The lack of objects with redshifts from WIYN spectroscopy in the range  $0.6 < z < 0.7$  is most likely due to the limits of the instrument’s spectral range. Objects with these redshifts have their  $\text{O II}$  and  $\text{H}\alpha$  lines shifted around the upper end of the spectral range. A small secondary peak appears for galaxies at redshift  $z \sim 1.2$ . All of these sources have prominent  $\text{Mg II}$  lines and are sources which were fitted with dust torii by the photometric redshift code.

In the case of the GMOS run there is a peak at  $z \sim 0.8$  due to the fact that most of the sources selected for this sample were selected to have photometric redshifts of  $\sim 1$  suggesting a very good agreement with the *PHOTO-Z* code used. In addition all of the single strong emission-line objects which were fitted with an  $\text{O II}$  line would appear to lie at a redshift range of  $0.8 < z < 1.0$ , which even though they consist only 5 per cent of the sample, contribute to the primary peak. A secondary peak which appears at low redshifts

are sources with strong  $\text{H}\alpha$  lines selected from the 24- $\mu\text{m}$  SWIRE sample. The much lower number of high-redshift sources found with GMOS is due to the restricted wavelength coverage of the instrument and the lack of usage of a blue grating which resulted in most of the lines shortwards [ $\text{Mg II}$ ] lying outside the observable range.

Fig. 1 (right-hand panel) shows the  $R$ -band distribution for the extragalactic sources. Cut-offs are due to the limitations of the 3.5- and 8-m telescopes to obtain spectroscopy of sources up to 21.5 and 23 mag, respectively, in a reasonable amount of time.

We have used Rowan-Robinson et al. (2008) template fitting method to fit SEDs to all observed sources and estimate IR luminosities. Among these there are six HLIRGs with  $L_{\text{IR}} > 10^{13} L_{\odot}$ . Fig. 2 shows the spectra of all HLIRGs observed and Table 2 summarizes their properties. This represents a major new sample of spectroscopically identified HLIRGs. There are just 57 HLIRGs with spectroscopic redshifts in the Imperial IRAS-FSC Redshift Catalogue (Wang & Rowan-Robinson 2009).

#### 3.1 HLIRG

Here we discuss the properties of the six HLIRGs in our sample.

**HLIRG1:** This source, which is one of the bright sources of our sample, was observed with WIYN because of its bright  $R$ -band magnitude ( $R = 20.83$ ). As it can be seen by its spectra in Fig. 2 it exhibits a broad [ $\text{Mg II}$ ] line at a redshift of 1.392 confirming the prediction of both optical and IR SED fitting that it is dominated by an AGN. Our observations show a marginal detection of [ $\text{O II}$ ] and  $\text{Fe II}$  lines. It has detections in all IRAC bands with very strong 24- $\mu\text{m}$  emission. The fact that this object has very reliable redshift estimation in addition to the very strong 24- $\mu\text{m}$  detection implies that the bolometric IR luminosity estimation is very reliable.

**HLIRG2:** This is also one of the bright ( $R = 20.75$ ) sources observed with WIYN. All the Balmer ( $H\gamma$ ,  $H\beta$ ) lines detected are quite broad with a possible detection of [ $\text{Mg II}$ ] at the edge of the wavelength coverage. Very strong [ $\text{O III}$ ] doublet, [ $\text{O II}$ ] and  $\text{Ne III}$  are clearly visible indicating also the presence of a starburst event present at the same time. This source lies at intermediate redshift (0.69) and is also a very strong 24- $\mu\text{m}$  emitter. Both optical and IR SED fitting imply the presence of a strong AGN, as confirmed by the broad lines, but with significant starburst contribution as also

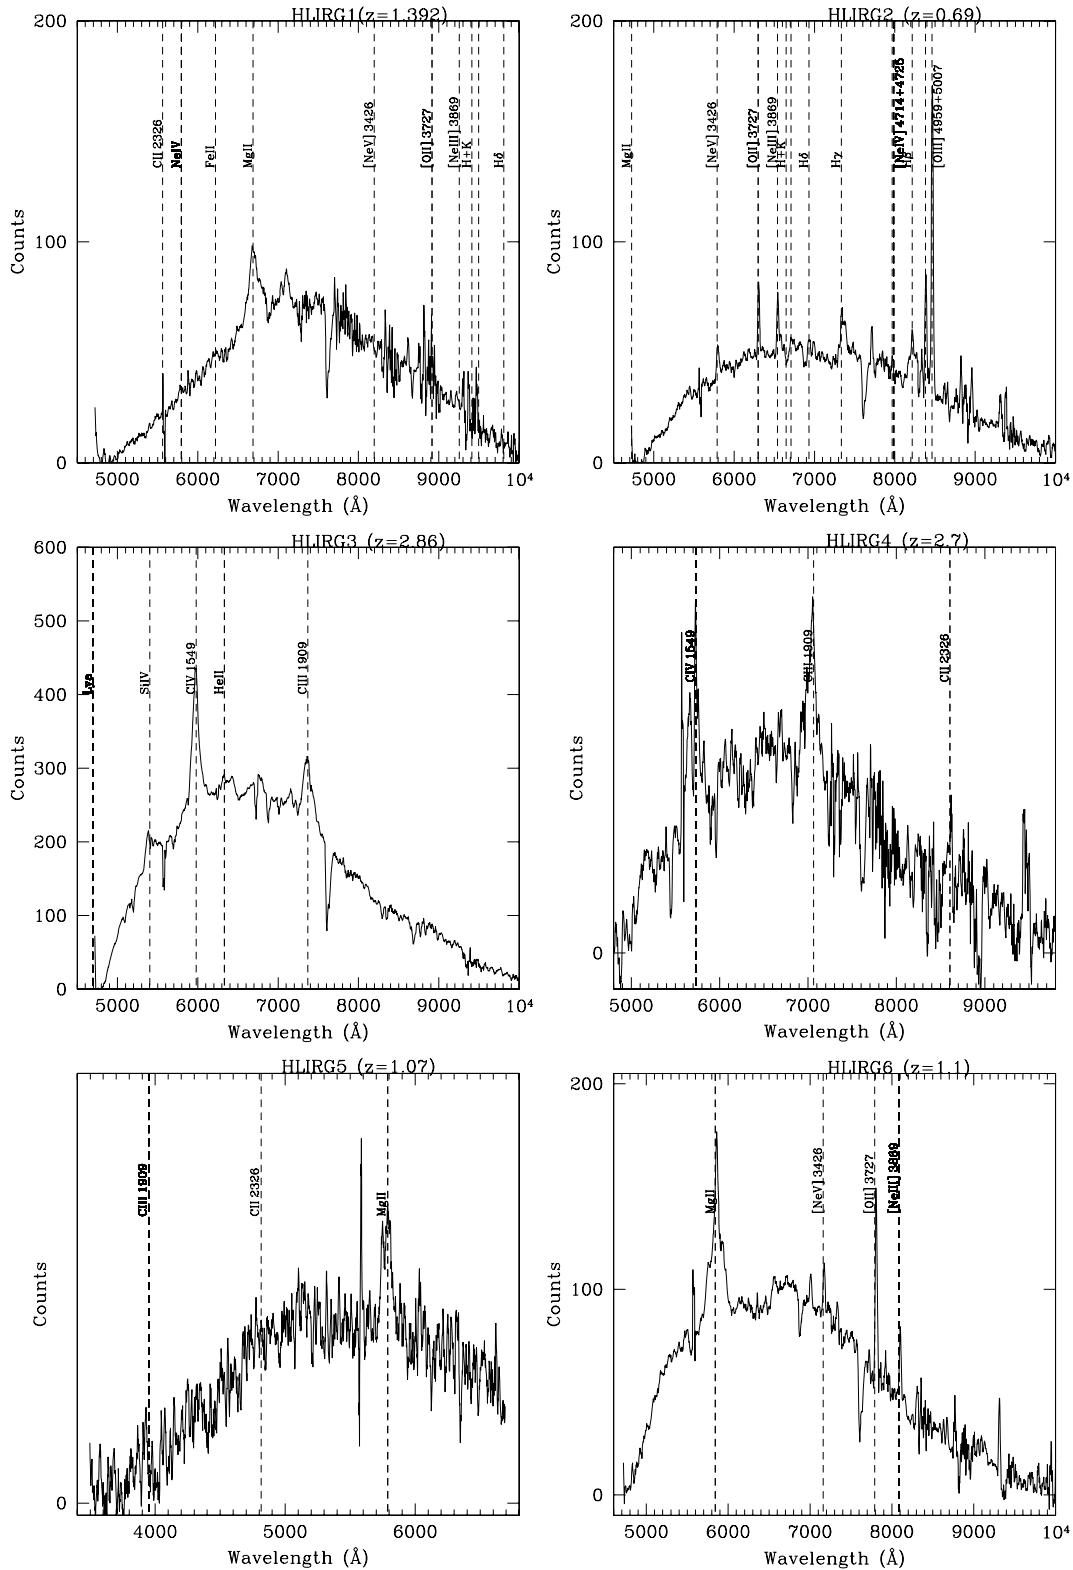

**Figure 2.** Optical spectra of all HLRGs found in our sample.

seen from its spectrum. Precise redshift and 24- $\mu$ m measurements make it an additional very strong candidate for HLRG status.

**HLRG3:** This is the brightest example ( $R = 18.99$ ) in the sample of HLRG at very high redshift ( $z = 2.86$ ). We have detected at least two broad lines C III and C IV, the possible detections of two

more Si IV and He II and the detection of Ly $\alpha$  in the blue. The clear presence of these lines makes it almost certain the presence of a very strong AGN which is also identified by optical and IR SED fitting. The latter though implies the presence of rather strong starburst at this early stage of evolution.

**Table 2.** Properties of the six HLIRGs with available spectra from GMOS/WIYN.

| ID      | RA       | Dec.    | $z^a$ | $R$   | $S_{24}^b$ | $\log(L_{\text{IR}})^c$ | J1 <sup>d</sup> | J2 <sup>e</sup> | TC <sup>f</sup> | SC <sup>g</sup> |
|---------|----------|---------|-------|-------|------------|-------------------------|-----------------|-----------------|-----------------|-----------------|
| HLIRG-1 | 242.9055 | 54.4291 | 1.392 | 20.83 | 5004       | 13.26                   | QSO             | Torus           | 1.0             | 0.0             |
| HLIRG-2 | 242.9449 | 54.0686 | 0.690 | 20.75 | 1563       | 13.22                   | QSO             | Torus           | 0.9             | 0.1             |
| HLIRG-3 | 242.8916 | 54.4591 | 2.860 | 18.99 | 1106       | 13.16                   | QSO             | Torus           | 0.9             | 0.1             |
| HLIRG-4 | 242.6961 | 54.6165 | 2.700 | 21.37 | 0          | 13.09                   | QSO             | Torus           | 1.0             | 0.0             |
| HLIRG-5 | 242.5173 | 54.2274 | 1.070 | 20.00 | 1906       | 13.31                   | QSO             | Torus           | 1.0             | 0.0             |
| HLIRG-6 | 242.7487 | 54.3648 | 1.100 | 20.44 | 1123       | 13.00                   | QSO             | Torus           | 0.6             | 0.4             |

<sup>a</sup>Spectroscopic Redshift.

<sup>b</sup>Observed 24- $\mu\text{m}$  fluxes in mJy.

<sup>c</sup>Bolometric IR luminosity(1–1000  $\mu\text{m}$ ) ( $H_0 = 72 \text{ km s}^{-1} \text{ Mpc}^{-1}$ ,  $\lambda = 0.7$ ).

<sup>d</sup>Optical SED best fit.

<sup>e</sup>IR SED best fit.

<sup>f</sup>Fraction of AGN contribution at 8  $\mu\text{m}$ .

<sup>g</sup>Fraction of starburst contribution at 8  $\mu\text{m}$ .

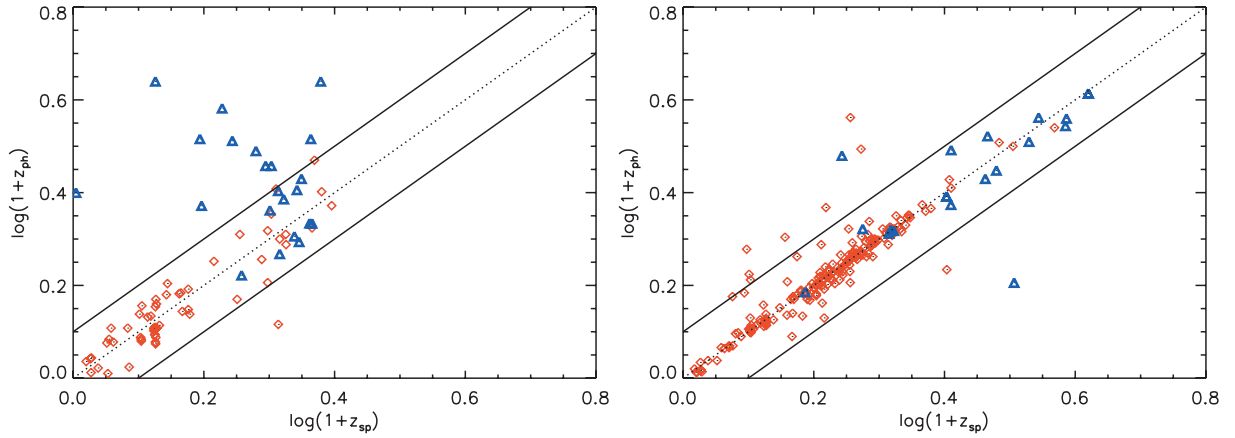

**Figure 3.** Left-hand panel: photometric versus spectroscopic redshift for all sources belonging either to  $\text{zflag} = 1$  or  $9$  (i.e. noisy spectra or single-line redshifts). The straight lines represent a  $\pm 0.1$  dex accuracy in  $\log(1+z)$ . Blue triangles are sources fitted with a QSO template and red diamonds are sources fitted with a galaxy template (Rowan-Robinson et al. 2008). Right-hand panel: photometric versus spectroscopic redshift for all sources belonging to the secure spectroscopic confidence classes  $\text{zflag} = 2$  and  $3$ . Colours and symbols are the same as the left-hand panel.

**HLIRG4:** This source exhibits three broad lines C II, C III and C IV. The clear detection of these lines indicates the presence of a QSO in agreement with SED fitting. It is the only source that lacks 24- $\mu\text{m}$  detection.

**HLIRG5:** This object exhibits a very broad Mg II line and marginal detections of C II and C III. The clear presence of the Mg II broad line in the slit makes the redshift estimation almost certain. It is a very strong 24- $\mu\text{m}$  emitter with detections in all IRAC and MIPS bands, except 160  $\mu\text{m}$ . Its SED shows an AGN-powered source with no evidence of ongoing star formation.

**HLIRG-6:** This object exhibits four strong lines, a broad [Mg II] line accompanied by the presence of Ne V, [O II] and Ne III. Spectroscopy and photometry agree to the fact that this is a composite object with clear presence of both an AGN and a star formation component.

#### 4 COMPARISON WITH PHOTOMETRIC REDSHIFTS

We have compared the spectroscopic redshifts obtained with GMOS/WIYN with photometric redshifts calculated using the latest version of the IMPZ code (Rowan-Robinson et al. 2008). Reliability and accuracy of the photometric redshifts are measured via the fractional error  $\Delta z/(1+z)$  for each source, examining the

mean error  $\overline{\Delta z}/(1+z)$ , the rms scatter  $\sigma_z$  and the rate of ‘catastrophic’ outliers  $\eta$ , defined as the fraction of the full sample that has  $|\Delta z/(1+z)| > 0.25$ .

Fig. 3 shows a comparison of  $\log_{10}(1+z_{\text{phot}})$  versus  $\log_{10}(1+z_{\text{spec}})$  for the entire sample of SWIRE ELAIS-N1 sources with available spectroscopy from GMOS/WIYN, where red diamonds are galaxies and blue triangles are QSOs, as reported by the photometric optical template fitting. For galaxies with confidence class  $\text{zflag} = 1$ , where there are ambiguous redshift solutions due to noisy spectra, we tried to use the information from the optical photometry to select between the aliases, where possible. IMPZ code found solutions for all sources. In the case of  $\text{zflag} = 2$  or  $3$  objects, the photometric code was successful at returning an accurate  $z_{\text{phot}}$  with  $\sigma_{\text{tot}} = 0.09$ ,  $\overline{\Delta z}/(1+z) = -0.008$  and only 4.4 per cent (10 sources) catastrophic outliers. One of the key results here is the excellent performance of the photometric code for both sources identified as QSOs from the optical fitting and for high-redshift sources with good quality of spectra. From the 19 sources with spectroscopic redshift  $z > 1.5$  there are only two catastrophic outliers. In addition from the 18 sources which were fitted with a QSO optical template the number of outliers was two. Taking into consideration the problems that photometric codes face with high-redshift sources and QSOs, and bearing in mind that the main power of photometric redshifts is their application in both these populations and

especially in high-redshift sources, this success is encouraging. In terms of outliers, possible reasons for these are either photometric redshift aliasing or poorer optical photometry for the case of the GMOS fainter sample. The photometric code outputs the  $\chi^2$  distribution as a function of redshift and from this we can assess whether

photometric redshift aliases are likely. This suggested that only for one of the 10 sources with  $|\log_{10}[(1+z_{\text{phot}})/(1+z_{\text{spec}})]| > 0.10$  is there an obvious photometric alias. The main cause for the remaining outliers in this sample is the worsening photometric accuracy at the fainter optical magnitudes sampled here.

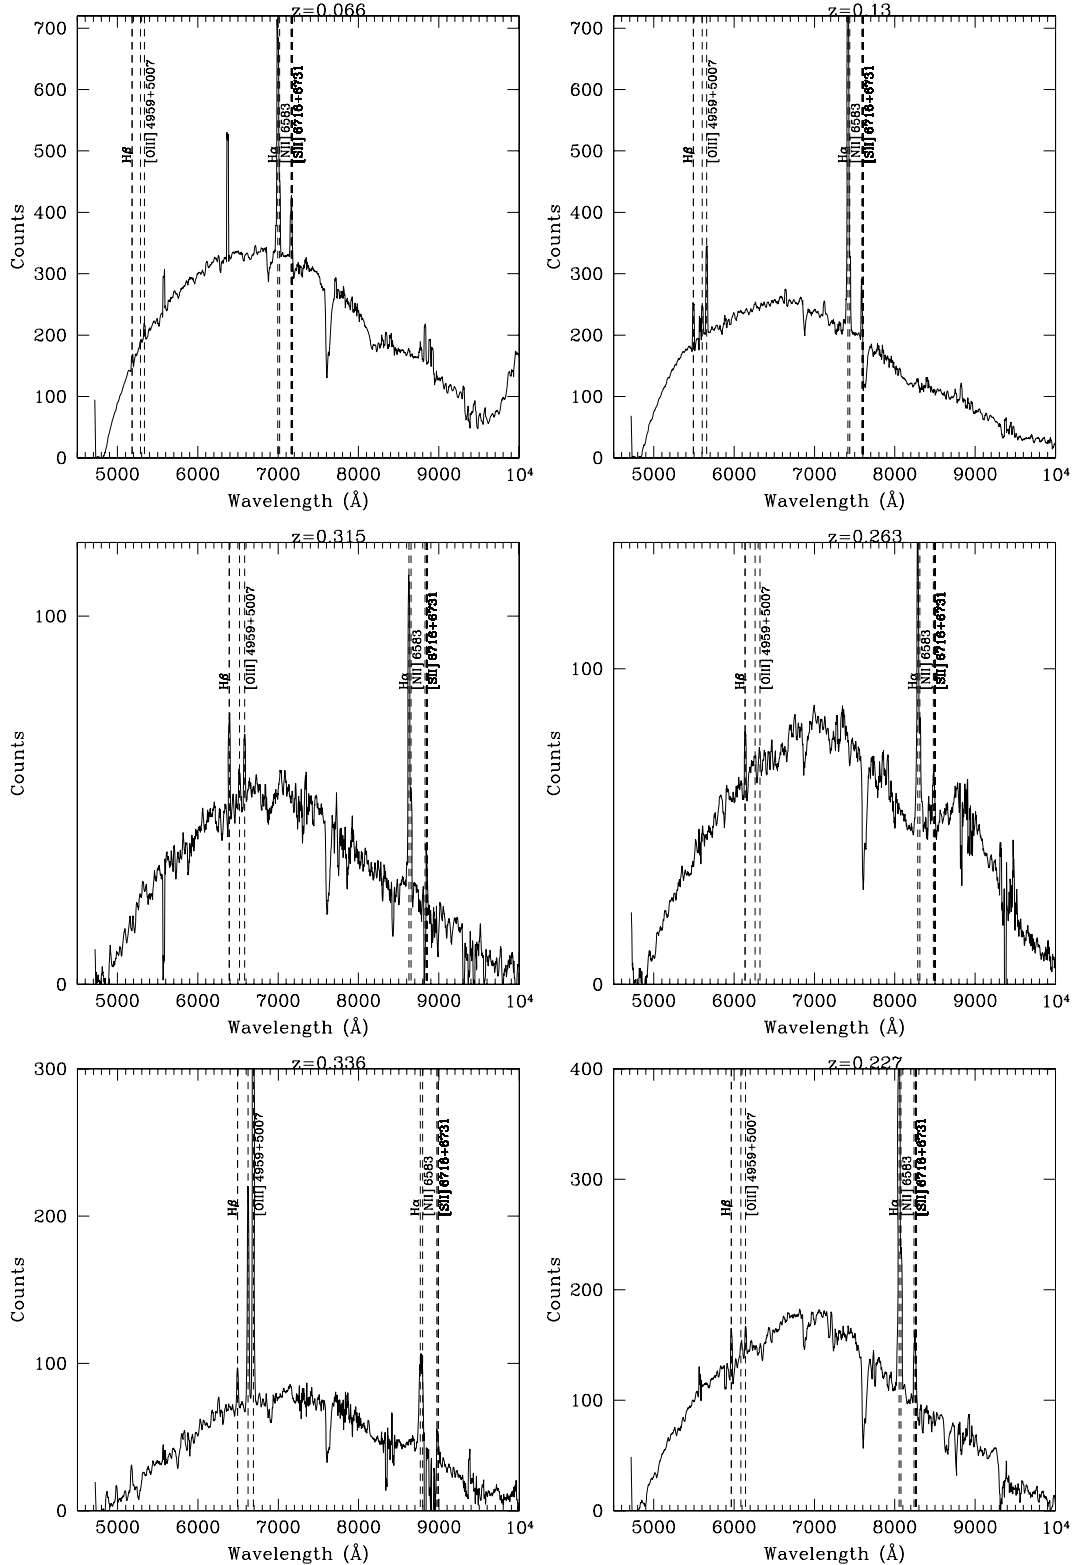

**Figure 4.** Examples of spectra with available [S II], H $\alpha$ , [O III], H $\beta$  and [N II] lines, used to estimate line ratios.

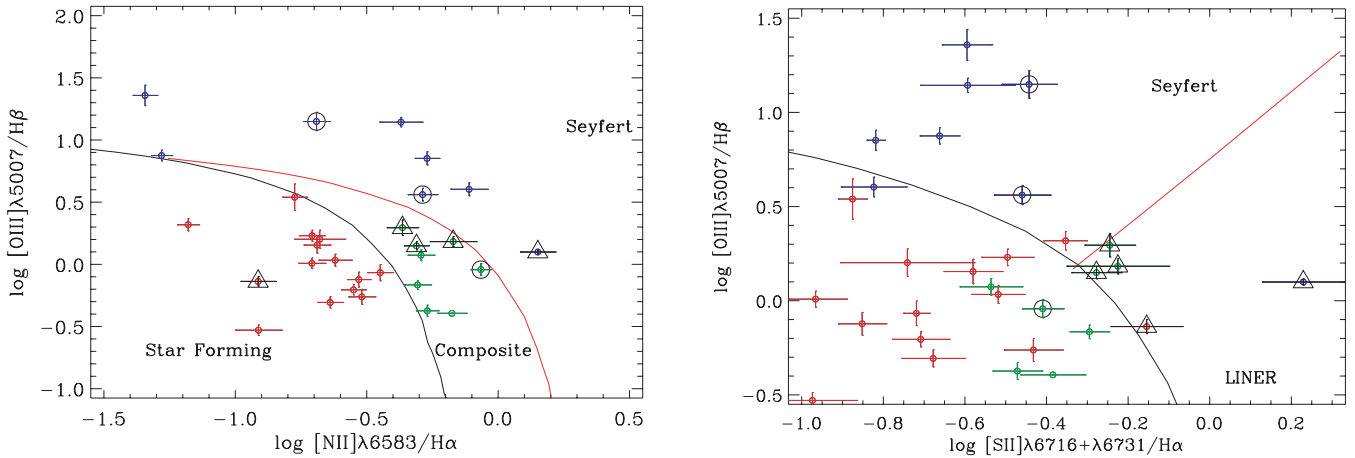

**Figure 5.** Left-hand panel: the  $[\text{N II}]/\text{H}\alpha$  versus  $[\text{O III}]/\text{H}\beta$  diagnostic diagram for all 30 sources with available lines. The black line is the pure star formation line (Kauffmann et al. 2003; Brinchmann et al. 2004). Red line is the extreme starburst line (Kewley et al. 2001). Right-hand panel: the  $[\text{S II}]/\text{H}\alpha$  versus  $[\text{O III}]/\text{H}\beta$  diagnostic diagram for all 30 sources with available lines. The red line is the Seyfert/LINER line (Kewley et al. 2006) and the black line is the AGN/starburst line (Baldwin et al. 1981). Both panels: open black circles are sources with X-ray detections from the ELAIS-N1 Deep X-ray survey (Manners et al. 2003). Red, blue and green colours represent sources identified as star forming, Seyfert and composite, respectively, based on the  $[\text{N II}]/\text{H}\alpha$  versus  $[\text{O III}]/\text{H}\beta$  diagnostic. Open black triangles are sources identified as LINERs based on the  $[\text{S II}]/\text{H}\alpha$  versus  $[\text{O III}]/\text{H}\beta$  diagnostic.

For the case of sources flagged as having ambiguous spectroscopic redshift estimations ( $z_{\text{flag}} = 1$  and 9; Fig. 3, left-hand panel) the agreement is broadly good, but it is noticeable that both in terms of the rms accuracy and in the number of serious outliers the results look worse than those presented for  $z_{\text{flag}} = 2$  and 3, suggesting that some of the increased scatter in Fig. 3 (left-hand panel) compared to Fig. 3 (right-hand panel) is due to incorrect spectroscopic redshifts. The percentage of catastrophic outliers is 15.4 per cent, of which 92 per cent are sources fitted with an optical QSO template. For sources with  $z_{\text{photo}} < 0.6$  we used the information from the optical photometry to select between aliases with relative success. The parameter space between  $0.7 < z_{\text{photo}} < 1.5$  is occupied mainly by the sources given a confidence class of 9. These are the very strong single emission-line objects fitted with an  $\text{O II}$  line. In the literature people tend to assign these objects either to  $\text{O II}$  or  $\text{H}\alpha$  lines (e.g. Le Fevre et al. 1995). In our case assignment to  $\text{O II}$  lines provides a good agreement with the photoz values with no catastrophic outliers. Significant disagreement occurs at  $z_{\text{phot}} > 1.5$  where most of our outliers occur. In this redshift range most of the prominent spectral features would be redshifted outside the wavelength coverage of both instruments with the set-up used here.

## 5 EMISSION-LINE DIAGNOSTICS

A suite of three emission-line diagnostic diagrams has been used to classify the dominant energy source in narrow emission-line galaxies (Baldwin, Phillips & Terlevich 1981). These diagrams are based on the three optical line ratios:  $[\text{O III}]/\text{H}\beta$ ,  $[\text{N II}]/\text{H}\alpha$  and  $[\text{S II}]/\text{H}\alpha$ . Although other ratios, such as  $[\text{O II}]/[\text{O III}]$ , offer cleaner separation between planetaries and  $\text{H II}$  regions (Baldwin et al. 1981), combinations such as  $[\text{N II}]/\text{H}\alpha$  versus  $[\text{O III}]/\text{H}\beta$  and  $[\text{S II}]/\text{H}\alpha$  versus  $[\text{O III}]/\text{H}\beta$  not only are very accurate in distinguishing the dominant component of narrow-line galaxies but are also very insensitive to reddening and do not require the samples to be flux calibrated. This is due to the fact that the lines in these pairs are chosen to be close in wavelength and as a result the line ratios are accurately determined even for non flux calibrated spectra. Kewley et al. (2001, 2006) used SDSS spectra to improve Baldwin et al. (1981) diagnostic diagrams.

They showed that the LINER/Seyfert divide in the  $[\text{O III}]/\text{H}\beta$  versus  $[\text{N II}]/\text{H}\alpha$  plot is more indicative of composite star-forming/AGN activity than a true LINER nature, and that the  $[\text{S II}]/\text{H}\alpha$  axis is better at distinguishing the LINERS.

We have identified a total of 30 sources with very secure detections of all five lines,  $[\text{O III}]$ ,  $\text{H}\beta$ ,  $[\text{N II}]$ ,  $\text{H}\alpha$  and  $[\text{S II}]$ . The flux in each emission line is measured using IRAF’s SPLIT routine, by interactively fitting a Gaussian function to each emission feature line profile and then integrating. Fig. 4 shows examples of the spectra of these objects.

Fig. 5 shows the  $[\text{N II}]/\text{H}\alpha$  versus  $[\text{O III}]/\text{H}\beta$  and  $[\text{S II}]/\text{H}\alpha$  versus  $[\text{O III}]/\text{H}\beta$  diagnostic diagram for our sample of 30 sources. The black line represents the most conservative AGN rejection criterion and they are the sources with very low contribution to  $\text{H}\alpha$  from AGNs (Brinchmann et al. 2004). This line is similar to Kauffmann et al. (2003) pure starburst line which has included this line to distinguish between pure star-forming sources and composite objects whose spectra contain significant contributions from both AGNs and star formation. Everything below this line is classed as  $\text{H II}$  region like galaxies. The red line in the  $[\text{N II}]/\text{H}\alpha$  versus  $[\text{O III}]/\text{H}\beta$  diagnostic is the line developed by Kewley et al. (2001). This line uses a combination of stellar population synthesis models and detailed self-consistent photoionization models to create a theoretical maximum starburst line. Everything that lies above this line should be AGN dominated. All sources that lie between these two lines are classed as composites and their spectra can be either due to a combination of star formation and a Seyfert nucleus or due to a combination of star formation and LINER emission. Fig. 5 (right-hand panel) shows the  $[\text{S II}]/\text{H}\alpha$  versus  $[\text{O III}]/\text{H}\beta$  diagnostic diagram for the same sample as before. The black line separates between AGN and star-forming galaxies while the red line provides an empirical division between LINER and Seyfert sources (Kewley et al. 2006).

Based on the  $[\text{N II}]/\text{H}\alpha$  versus  $[\text{O III}]/\text{H}\beta$  diagram from the 30 sources in our sample we have found 14 pure star-forming sources, eight Seyferts and eight composite objects. According to the  $[\text{S II}]/\text{H}\alpha$  versus  $[\text{O III}]/\text{H}\beta$  diagnostic, one Seyfert, three composites and one star-forming sources appear to be LINERS.

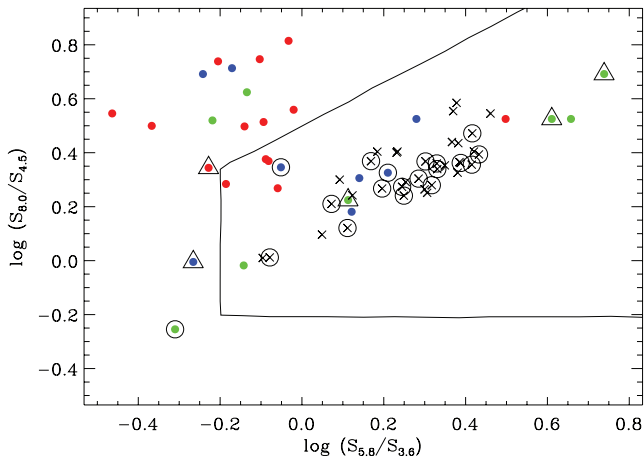

**Figure 6.** IRAC colour–colour plot (Lacy et al. 2004) of all spectroscopically classified GMOS/WIYN sources with detections in all IRAC bands, namely the 30 narrow-line emission sources and the 35 broad-line QSOs. Open black circles are sources with X-ray detections (Manners et al. 2003). Black crosses are broad-line QSOs. Red, blue and green colours are sources identified as star forming, Seyfert and composite, respectively, based on the  $[\text{N II}]/\text{H}\alpha$  versus  $[\text{O III}]/\text{H}\beta$  diagnostic. Open black triangles are sources identified as LINERs based on the  $[\text{S II}]/\text{H}\alpha$  versus  $[\text{O III}]/\text{H}\beta$  diagnostic.

## 6 COLOUR–COLOUR DIAGRAMS AND SPECTRAL ENERGY DISTRIBUTIONS

In this section we utilize SWIRE IR data and GMOS/WIYN spectroscopic data to reproduce the Lacy et al. (2004) IRAC colour–colour plot. For the Lacy et al. (2004) diagnostic we require sources to have detections in all four IRAC bands, 3.6, 4.5, 5.8 and 8  $\mu\text{m}$ . Fig. 6 shows the Lacy et al. (2004) diagnostic diagram for the sample of the 30 narrow-line galaxies and the 35 broad-line QSOs found in the GMOS/WIYN spectroscopic catalogue. Sources that lie within the black line are those expected to be AGN dominated from the IRAC colours (Lacy et al. 2004).

All broad-line objects lie within the AGN wedge as predicted by Lacy et al. (2004) and more than half of them (19/35) have been detected at X-ray wavelengths. In addition 33/35 broad-line QSOs are fitted with a QSO template at optical wavelengths. The remaining two were fitted with a starburst template and are the only ones in this broad-line sample which have broad Balmer lines and evidence of star formation. Indeed the SEDs of these two objects are composite and show both an AGN and a starburst component with the starburst dominating at 8  $\mu\text{m}$ .

Turning to the population of narrow emission-line galaxies, the majority of the star-forming sources lie on the top left-hand side of the IRAC colour–colour parameter space and outside the AGN wedge in agreement with previous results which utilized 24- $\mu\text{m}$ -selected samples (Donley et al. 2008). In the case of the narrow-line AGN, five lie within the AGN wedge, two occupy the same parameter space as the star-forming sources and only one lies in the type II parameter space, as this was defined by Donley et al. (2008) for low- $z$  narrow-line AGNs. Composite objects and LINERs do not occupy a specific part of the plot. Fig. 7 shows the IRAC colour–colour diagnostic from Stern et al. (2005). Similarly to Lacy et al. (2004), the diagnostic is effective in constraining the broad-line objects but not the type II Seyferts.

Lacy et al. (2007) studied a similar sample of low- $z$  ( $z \leq 0.3$ ) 24- $\mu\text{m}$  sources with optical spectra and found some narrow-line AGNs in the top left-hand region of the plot. Based on their strong  $[\text{O II}]$  lines and composite nature, Lacy et al. (2007) concluded that

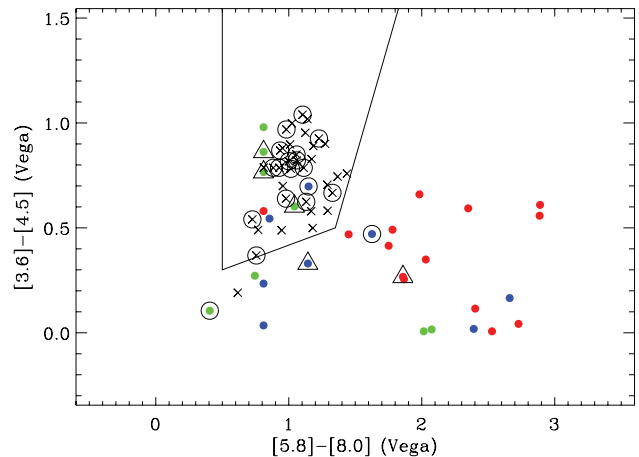

**Figure 7.** IRAC colour–colour plot (Stern et al. 2005) of all spectroscopically classified GMOS/WIYN sources with detections in all IRAC bands, namely the 30 narrow-line emission sources and the 35 broad-line QSOs. Open black circles are sources with X-ray detections (Manners et al. 2003). Black crosses are broad-line QSOs. Red, blue and green colours are sources identified as star forming, Seyfert and composite, respectively, based on the  $[\text{N II}]/\text{H}\alpha$  versus  $[\text{O III}]/\text{H}\beta$  diagnostic. Open black triangles are sources identified as LINERs based on the  $[\text{S II}]/\text{H}\alpha$  versus  $[\text{O III}]/\text{H}\beta$  diagnostic.

the 8- $\mu\text{m}$  flux was being enhanced by polycyclic aromatic hydrocarbon emission from star formation of high enough equivalent width to affect their IRAC colours which is consistent with what we find in the case of only one of our narrow-line AGNs that lies outside the wedge. The remaining two show evidence of a quiescent galaxy template that dominates their IR emission.

Fig. 8 shows the SEDs for all 13 narrow-line objects that lie outside the wedge and occupy the top left-hand region of the IRAC

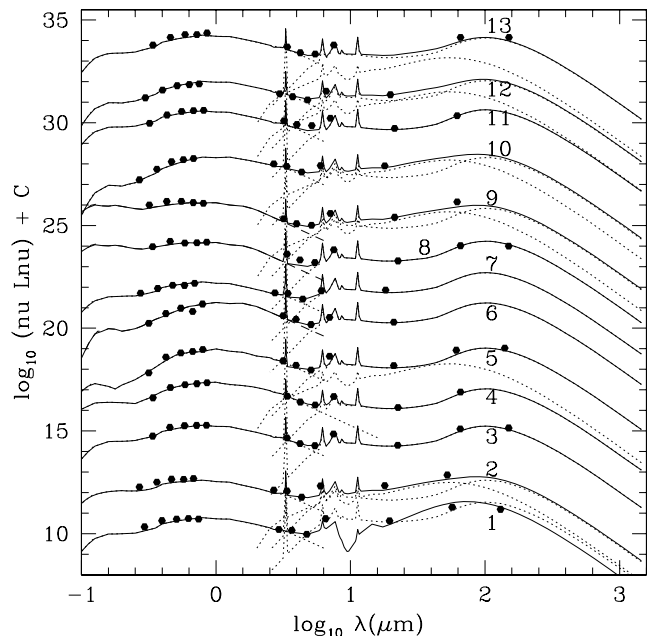

**Figure 8.** SEDs for the 13 narrow emission-line galaxies that occupy the star formation region of the Lacy et al. (2004) diagnostic. Seven are fitted with a pure ‘cirrus’ template (objects 3–8 and 11), five require cirrus + an M82 starburst template (objects 2, 5, 9, 10, 12 and 13) and one (object 1) is fitted with an Arp 220 starburst template. Parameters for all 13 galaxies are given in Table 2.



**Table 3.** Parameters for narrow emission-line AGN in our spectroscopic survey, see Fig. 8. The parameters have been estimated using the SED template fitting method from Rowan-Robinson et al. (2008). Table columns give object number, RA, Dec., spectroscopic redshift, spectroscopic type,  $\log_{10}$  bolometric luminosity in cirrus component (from template fit), bolometric luminosity in starburst component (M82 type unless indicated in bracket as Arp 220 type), bolometric luminosity in optical component (from template fit), optical template type and visual extinction in magnitudes.

| Object no. | RA         | Dec.       | $z_{\text{spec}}$ | Spectral type | $L_{\text{cirr}}$ | $L_{\text{sb}}$ | $L_{\text{opt}}$ | Type | $A_V$ |
|------------|------------|------------|-------------------|---------------|-------------------|-----------------|------------------|------|-------|
| 1          | 242.671 88 | 54.175 59  | 0.227             | LINER/SF      |                   | 11.58 (A220)    | 10.98            | Scd  | 0.3   |
| 2          | 242.612 04 | 54.177 194 | 0.336             | Composite     | 10.72             | 10.67           | 10.80            | Scd  | 0.0   |
| 3          | 242.830 70 | 54.215 78  | 0.069             | SF            | 10.15             |                 | 10.35            | Scd  | 0.3   |
| 4          | 242.715 74 | 54.231 11  | 0.063             | SF            | 9.97              |                 | 10.77            | Sab  | 0.0   |
| 5          | 242.822 78 | 54.274 74  | 0.143             | SF            | 11.02             |                 | 10.92            | E    | 0.0   |
| 6          | 242.823 20 | 54.279 25  | 0.144             | SF            | 10.22             |                 | 10.72            | sb   | 1.3   |
| 7          | 242.778 63 | 54.311 21  | 0.315             | SF            | 10.80             |                 | 10.48            | Scd  | 0.2   |
| 8          | 242.441 96 | 54.357 222 | 0.066             | SF            | 10.15             |                 | 10.35            | sb   | 0.0   |
| 9          | 242.766 22 | 54.401 52  | 0.130             | SF            | 9.81              | 9.71            | 10.35            | sb   | 0.0   |
| 10         | 243.089 87 | 54.435 93  | 0.338             | Composite     | 10.41             | 10.36           | 10.72            | Scd  | 1.0   |
| 11         | 243.258 75 | 54.479 611 | 0.126             | SF            | 10.6              |                 | 10.7             | Scd  | 0.3   |
| 12         | 242.425 02 | 54.550 11  | 0.212             | NLAGN         | 10.09             | 9.61            | 10.27            | Scd  | 0.6   |
| 13         | 242.765 59 | 54.722 82  | 0.063             | NLAGN         | 10.05             | 9.15            | 10.35            | Scd  | 0.4   |

colour–colour plot and Table 3 summarizes their properties. All of them are fitted with the standard IR templates of Rowan-Robinson et al. (2004, 2005, 2008). The templates used are (1) IR ‘cirrus’, optically thin emission from interstellar dust illuminated by the galaxy’s radiation field, (2) an M82-like starburst, (3) a more extreme, Arp220-like, starburst and (4) an AGN dust torus. All 13 objects are either fitted with an IR starburst template or a quiescent galaxy (‘cirrus’) template. None have detectable AGN dust tori at IR wavelengths or X-ray detections. For the two type II Seyferts, non-detection in X-rays suggests that these are either very low-luminosity AGNs or that the central engine is obscured by a high column of dust. The fact that these narrow-line AGNs are low-redshift objects, with IR colours typical of quiescent or starburst galaxies and with no evidence of dust tori, and that there is no evidence for a QSO contribution in the optical continuum, suggests that these are probably low-luminosity AGNs completely missed by both X-rays and IR colour diagnostics. The only evidence for an AGN comes from the presence of narrow emission lines with the appropriate line ratios.

## 7 SUMMARY

We present the largest spectroscopic follow-up performed in SWIRE ELAIS-N1 using the GMOS on Gemini-North and the Hydra multi-object spectrometer on the WIYN telescope. The values of spectroscopic redshifts of the later have been compared with the estimated values from our photometric redshift code with very good agreement between the two for both galaxies and quasars, even for sources with very faint optical magnitudes. The scatter between spectroscopic and photometric redshifts was worse for objects with poorer quality spectroscopic data, suggesting that at least part of this increased scatter is due to incorrect spectroscopic redshifts.

We identified six HLIRGs with spectroscopic redshifts, all of which had QSO spectra in the optical, and mid-IR SEDs dominated by dust tori.

For 30 galaxies with five diagnostic lines present ( $[\text{O III}]$ ,  $\text{H}\beta$ ,  $[\text{N II}]$ ,  $\text{H}\alpha$  and  $[\text{S II}]$ ) we have classified the galaxies into star forming, Seyfert, composite and LINER. Broad-line AGNs all show dust torus components in the IR and this explains why they lie within the

IR colour space defined by Lacy et al. (2004). However, narrow-line AGNs do not all lie in the colour space proposed by Lacy et al. (2004) and Donley et al. (2008), in agreement with Barmby et al. (2006) who showed that mid-IR diagnostics cannot identify optical type II AGNs. IR SED fitting suggests that the type II sources that do not lie in the proposed AGN parameter spaces are all starburst dominated or quiescent galaxies. Any dust torus present must be very weak.

## ACKNOWLEDGMENTS

The authors wish to thank the SWIRE team for their constructive comments on the original GMOS and WIYN ELAIS-N1 proposals. Also the authors would like to thank Mark Lacy and the anonymous referee for their useful comments. This work has been supported by funding from the Peren grant (MT) and the STFC Rolling grant (MT).

## REFERENCES

- Baldwin J. A., Phillips M. M., Terlevich R., 1981, *PASP*, 93, 5  
 Barmby P. et al., 2006, *ApJ*, 642, 126  
 Benitez N. et al., 2004, *ApJS*, 150, 1  
 Brinchmann J., Charlot S., White S. D. M., Tremonti C., Kauffmann G., Heckman T., Brinkmann J., 2004, *MNRAS*, 351, 1151  
 Donley J. L., Rieke G. H., Pérez-González P. G., Barro G., 2008, *ApJ*, 687, 111  
 Franceschini A. et al., 2005, *AJ*, 129, 2074  
 Georgantopoulos I., Georgakakis A., Akylas A., 2007, *A&A*, 466, 823  
 Georgantopoulos I., Georgakakis A., Rowan-Robinson M., Rovilos E., 2008, *A&A*, 484, 671  
 Hatziminaoglou E. et al., 2005, *MNRAS*, 364, 47  
 Jarrett T. et al., 2006, *AJ*, 131, 261  
 Kauffmann G. et al., 2003, *MNRAS*, 346, 1055  
 Kauffmann G., White S. D. M., Heckman T. M., Ménard B., Brinchmann J., Charlot S., Tremonti C., Brinkmann J., 2004, *MNRAS*, 353, 713  
 Kewley L., Dopita M. A., Sutherland R. S., Heisler C. A., Trevena J., 2001, *ApJ*, 556, 121  
 Kewley L. J., Groves B., Kauffmann G., Heckman T., 2006, *MNRAS*, 372, 961  
 Lacy M. et al., 2004, *ApJS*, 154, 166

- Lacy M., Sajina A., Petric A. O., Seymour N., Canalizo G., Ridgway S. E., Armus L., Storrie-Lombardi L. J., 2007, *ApJ*, 669, 61  
 Le Fevre O., Crampton D., Lilly S. J., Hammer F., Tresse L., 1995, *ApJ*, 455, 60  
 Lonsdale C. et al., 2003, *PASP*, 115, 897  
 Lonsdale C. et al., 2004, *ApJS*, 154, 54  
 Manners J. et al., 2003, *MNRAS*, 343, 293  
 Rowan-Robinson M. et al., 2004, *MNRAS*, 35, 1290  
 Rowan-Robinson M. et al., 2005, *AJ*, 129, 1183  
 Rowan-Robinson M. et al., 2008, *MNRAS*, 386, 697  
 Stern D. et al., 2005, *ApJ*, 631, 163  
 Wang L., Rowan-Robinson M., 2009, *MNRAS*, 398, 109

**SUPPORTING INFORMATION**

Additional Supporting Information may be found in the online version of this article:

**Table A1.** The GMOS/WIYN spectroscopic catalogue.

Please note: Wiley-Blackwell are not responsible for the content or functionality of any supporting materials supplied by the authors. Any queries (other than missing material) should be directed to the corresponding author for the article.

**APPENDIX A**

**Table A1.** Sample of the GMOS/WIYN spectroscopic catalogue. The full catalogue can be accessed online (see Supporting Information). Table columns give right ascension (RA) of the source (J2000), declination (Dec.) of the source (J2000), SWIRE 3.6- $\mu\text{m}$  flux ( $\mu\text{Jy}$ ), SWIRE 24- $\mu\text{m}$  flux ( $\mu\text{Jy}$ ), *R*-band magnitude (Vega), optical template type (one to two elliptical galaxies, three to 11 galaxies, 13–15 QSOs),  $M_B$  corrected for extinction,  $\log_{10}$  of bolometric optical luminosity (in solar units), GMOS/WIYN spectroscopic redshift, quality flag of spectroscopic redshift,  $\log_{10}$  of bolometric IR luminosity (in solar units) and IR template type (dominated by 1 = cirrus, 2 = M82 starburst, 3 = A220 starburst, 4 = AGN sust torus, 5 = single band excess and 6 = no excess).

| RA      | Dec.    | $S_{3.6}$ | $S_{24}$ | <i>R</i> | J1 | $M_B$  | $\log L_{OP}$ | <i>Z</i> | Flag | $\log L_{IR}$ | J2 |
|---------|---------|-----------|----------|----------|----|--------|---------------|----------|------|---------------|----|
| 244.086 | 55.1308 | 81.47     | 531.59   | 22.17    | 5  | −22.7  | 11.48         | 0.941    | 2    | 12.88         | 3  |
| 242.696 | 53.3702 | 103.67    | 0.0      | 21.72    | 1  | −22.02 | 11.34         | 0.7      | 2    | 0.0           | 6  |
| 242.742 | 53.3823 | 45.7      | 270.51   | 22.65    | 10 | −20.21 | 10.41         | 1.118    | 1    | 10.58         | 4  |
| 242.787 | 53.3794 | 15.15     | 0.0      | 22.83    | 11 | −21.25 | 10.91         | 0.838    | 3    | 0.0           | 6  |
| 242.698 | 53.3865 | 32.5      | 222.56   | 22.0     | 8  | −21.74 | 10.98         | 0.661    | 2    | 11.18         | 5  |
| 242.694 | 53.3951 | 14.86     | 0.0      | 22.72    | 9  | −21.8  | 10.97         | 0.681    | 2    | 0.0           | 6  |
| 242.798 | 53.3922 | 19.45     | 0.0      | 22.39    | 9  | −22.08 | 11.09         | 0.736    | 3    | 0.0           | 6  |
| 242.782 | 53.3981 | 61.78     | 0.0      | 21.94    | 7  | −21.58 | 10.95         | 0.646    | 3    | 0.0           | 6  |
| 242.691 | 53.4032 | 13.82     | 155.78   | 23.48    | 7  | −21.0  | 10.72         | 1.07     | 2    | 11.32         | 5  |
| 242.723 | 53.4104 | 11.93     | 0.0      | 22.2     | 11 | −20.32 | 10.53         | 0.514    | 3    | 0.0           | 6  |
| 242.739 | 53.4144 | 16.0      | 0.0      | 22.84    | 3  | −19.6  | 10.28         | 0.599    | 1    | 0.0           | 6  |
| 242.71  | 53.4268 | 9.06      | 0.0      | 22.47    | 3  | −18.8  | 9.96          | 0.375    | 1    | 0.0           | 6  |
| 242.745 | 53.4429 | 17.43     | 140.81   | 23.14    | 1  | −19.58 | 10.36         | 0.585    | 1    | 10.55         | 5  |
| 242.817 | 53.447  | 59.07     | 0.0      | 23.15    | 2  | −21.35 | 11.03         | 0.885    | 2    | 0.0           | 6  |
| 243.648 | 53.6343 | 6.05      | 0.0      | 22.58    | 5  | −17.27 | 9.31          | 0.176    | 1    | 0.0           | 6  |
| 243.576 | 53.64   | 50.57     | 295.5    | 22.3     | 8  | −22.56 | 11.31         | 1.041    | 2    | 11.6          | 2  |
| 243.556 | 53.6434 | 22.8      | 0.0      | 22.07    | 11 | −21.56 | 11.03         | 0.691    | 9    | 0.0           | 6  |
| 243.046 | 54.3197 | 111.92    | 1542.13  | 19.9     | 13 | −24.6  | 12.35         | 1.53     | 3    | 12.37         | 4  |
| 242.047 | 54.3475 | 199.79    | 3196.56  | 19.41    | 13 | −24.37 | 12.26         | 1.32     | 3    | 12.88         | 4  |
| 242.131 | 54.3524 | 89.32     | 788.82   | 19.78    | 15 | −23.98 | 12.11         | 1.2      | 3    | 11.83         | 4  |
| 242.02  | 54.3565 | 127.46    | 929.87   | 19.32    | 13 | −22.77 | 11.62         | 2.21     | 3    | 11.03         | 4  |
| 242.749 | 54.3648 | 77.67     | 1122.36  | 20.44    | 13 | −23.95 | 12.09         | 1.1      | 3    | 13.0          | 4  |
| 242.884 | 54.3867 | 47.07     | 302.63   | 20.58    | 13 | −25.14 | 12.57         | 3.17     | 3    | 12.59         | 4  |
| 242.428 | 54.4153 | 78.47     | 934.21   | 19.59    | 13 | −22.84 | 11.65         | 2.383    | 3    | 11.34         | 4  |
| 242.906 | 54.4291 | 467.48    | 5003.16  | 20.83    | 14 | −25.29 | 12.63         | 1.392    | 3    | 13.26         | 4  |

This paper has been typeset from a  $\text{\TeX}/\text{\LaTeX}$  file prepared by the author.
